# Supplementary material for: PD-L1 Expression in Circulating Tumor Cells Increases during Radio(chemo)therapy and Indicates Poor Prognosis in Non-small Cell Lung Cancer
Source: PubMed Central journal article supplement (PMC6345864; doi:10.1038/s41598-018-36096-7), 2019-01-24
Supplement: 41598_2018_36096_MOESM1_ESM.pdf [file 41598_2018_36096_MOESM1_ESM.pdf]

## Supplementary Material

### **PD-L1 Expression in Circulating Tumor Cells Increases during Radio(chemo)therapy and Indicates Poor Prognosis in Non-small Cell Lung Cancer**

Yang Wang<sup>1,2</sup>, Tae Hyun Kim<sup>2,3</sup>, Shamileh Fouladdel<sup>2,4</sup>, Zhuo Zhang<sup>1,2</sup>, Payal Soni<sup>5</sup>, Angel Qin<sup>4</sup>, Lili Zhao<sup>6</sup>, Ebrahim Azizi<sup>2,4</sup>, Theodore S. Lawrence<sup>5</sup>, Nithya Ramnath<sup>4</sup>, Kyle C. Cuneo<sup>5,7\*</sup>, Sunitha Nagrath<sup>1,2,8\*</sup>

<sup>1</sup>Department of Chemical Engineering, University of Michigan, Ann Arbor, MI

<sup>2</sup>Biointerfaces Institute, University of Michigan, Ann Arbor, MI

<sup>3</sup>Department of Electrical Engineering and Computer Science, University of Michigan, Ann Arbor, MI, USA

<sup>4</sup>Department of Internal Medicine, University of Michigan Comprehensive Cancer Center, Ann Arbor, MI

<sup>5</sup>Department of Radiation Oncology, University of Michigan Medical School, Ann Arbor, MI, USA

<sup>6</sup>Department of Biostatistics, University of Michigan, Ann Arbor, MI

<sup>7</sup>Veterans Administration Ann Arbor Healthcare System, Ann Arbor, MI 48105

<sup>8</sup>Translational Oncology Program, University of Michigan Health System, Ann Arbor, MI.

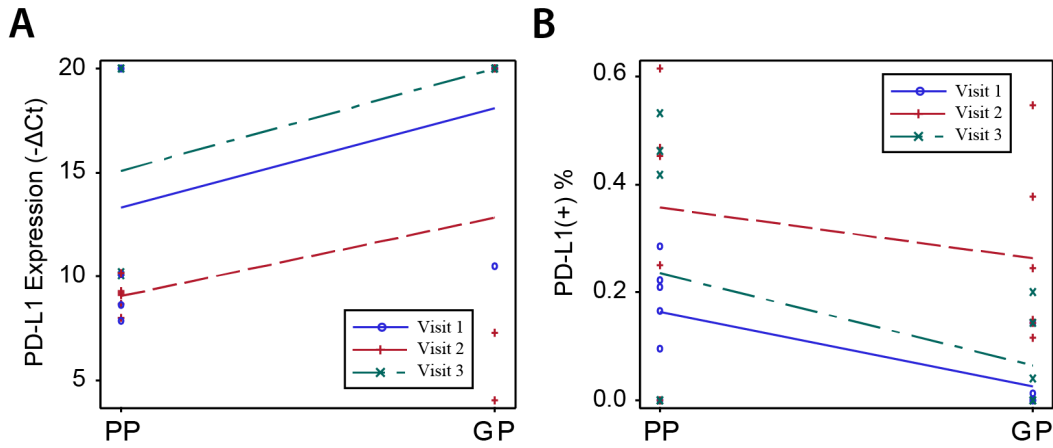

**Figure S1.** (A) The interaction plot of mRNA expression level ( $-\Delta C_t$ ) of PD-L1 (A) in PP samples (n=15) versus GP samples (n=14). (B) The interaction plot of PD-L1 (+) CTCs % in PP samples (n=17) versus GP samples (n=18). PP stands for poor prognosis and GP stands for good prognosis.

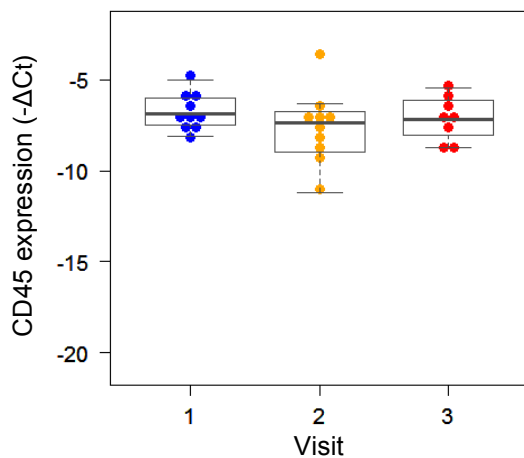

**Figure S2.** mRNA level ( $-\Delta C_t$ ) of CD45 in visit 1 samples (n=11), visit 2 samples (n=11) and visit 3 samples (n=9).

**Table S1.** Demographics of patients.

| Patient    | Age | Sex  | Histology             | T  | N | M | RT dose | RT fraction size | Concurrent chemo | Concurrent chemo drugs | Adjuvant chemo |
|------------|-----|------|-----------------------|----|---|---|---------|------------------|------------------|------------------------|----------------|
| Patient 1  | 60  | Male | Adenocarcinoma        | 2a | 1 | 0 | 60      | 2                | No               | N/A                    | No             |
| Patient 2  | 79  | Male | Carcinoma             | 2  | 0 | 0 | 70      | 2                | No               | N/A                    | No             |
| Patient 3  | 64  | Male | Adenocarcinoma        | 1  | 0 | 0 | 50      | 10               | No               | N/A                    | No             |
| Patient 4  | 73  | Male | Squamous              | 1a | 3 | 0 | 50      | 5                | No               | N/A                    | No             |
| Patient 5  | 72  | Male | Squamous              | 2a | 1 | 0 | 60      | 2                | Yes              | Carboplatin /Taxol     | No             |
| Patient 6  | 67  | Male | Sarcomatoid carcinoma | 3  | 2 | 0 | 60      | 2                | Yes              | Carboplatin /Taxol     | No             |
| Patient 7  | 65  | Male | Squamous              | 4  | 3 | 0 | 60      | 2                | Yes              | Carboplatin /Taxol     | No             |
| Patient 8  | 63  | Male | Squamous              | 2b | 0 | 0 | 60      | 2                | Yes              | Carboplatin /Taxol     | No             |
| Patient 9  | 82  | Male | Squamous              | 3  | 2 | 0 | 60      | 2                | Yes              | Carboplatin /Taxol     | No             |
| Patient 10 | 60  | Male | Adenocarcinoma        | 4  | 3 | 0 | 60      | 2                | Yes              | Carboplatin /Taxol     | Yes            |
| Patient 11 | 57  | Male | Squamous              | 1b | 3 | 0 | 60      | 2                | Yes              | Carboplatin /Taxol     | No             |
| Patient 12 | 67  | Male | Squamous              | 2b | 2 | 0 | 60      | 2                | Yes              | Cisplatin/ Etoposide   | No             |
| Patient 13 | 66  | Male | Squamous              | 2  | 0 | 0 | 50      | 5                | No               | N/A                    | No             |

**Table S2.** The number of CK (+)/CD45 (-) cells in 6 healthy control samples.

| Healthy Control | Age | Gender | PD-L1(+)/CK(+)<br>/CD45(-) cells<br>(/ml) | PD-L1(-)/CK(+)<br>/CD45(-) cells<br>(/ml) | Total<br>CK+/CD45- cells<br>(/ml) |
|-----------------|-----|--------|-------------------------------------------|-------------------------------------------|-----------------------------------|
| HC1             | 89  | Male   | 0                                         | 2                                         | 2                                 |
| HC2             | 27  | Female | 0                                         | 2                                         | 2                                 |
| HC3             | 27  | Female | 1                                         | 2                                         | 3                                 |
| HC4             | 28  | Female | 0                                         | 2                                         | 2                                 |
| HC5             | 20  | Male   | 1                                         | 1                                         | 2                                 |
| HC6             | 32  | Male   | 0                                         | 3                                         | 3                                 |

**Table S3.** A list of total CTC number, PD-L1 (+) CTC number and the fraction of PD-L1 (+) CTCs at different visits for 13 patients. ("N/A" stands for "not available".)

| Patient    | Visit 1    |                      |                              | Visit 2    |                      |                              | Visit 3    |                      |                              |
|------------|------------|----------------------|------------------------------|------------|----------------------|------------------------------|------------|----------------------|------------------------------|
|            | CTCs (/ml) | PD-L1 (+) CTCs (/ml) | Proportion of PD-L1 (+) CTCs | CTCs (/ml) | PD-L1 (+) CTCs (/ml) | Proportion of PD-L1 (+) CTCs | CTCs (/ml) | PD-L1 (+) CTCs (/ml) | Proportion of PD-L1 (+) CTCs |
| Patient 1  | 6          | 1                    | 17%                          | 70         | 43                   | 61%                          | 32         | 17                   | 53%                          |
| Patient 2  | 48         | 0                    | 0%                           | 15.5       | 0.5                  | 3%                           | 17         | 2                    | 12%                          |
| Patient 3  | 7          | 1                    | 14%                          | 5.5        | 3                    | 55%                          | 7          | 0                    | 0%                           |
| Patient 4  | 5          | 0                    | 0%                           | 21         | 3                    | 14%                          | 9          | 0                    | 0%                           |
| Patient 5  | 71         | 1                    | 1%                           | 57         | 21.5                 | 38%                          | 24         | 1                    | 4%                           |
| Patient 6  | 14         | 0                    | 0%                           | 13         | 1.5                  | 12%                          | 4          | 0                    | 0%                           |
| Patient 7  | 72         | 16                   | 22%                          | 31         | 14                   | 45%                          | 13         | 6                    | 46%                          |
| Patient 8  | 62         | 13                   | 21%                          | 4          | 0                    | 0%                           | 12         | 5                    | 42%                          |
| Patient 9  | 8          | 0                    | 0%                           | 22.5       | 5.5                  | 24%                          | 21         | 3                    | 14%                          |
| Patient 10 | 17         | 0                    | 0%                           | 10         | 1.5                  | 15%                          | 5          | 1                    | 20%                          |
| Patient 11 | 21         | 2                    | 10%                          | 6          | 1.5                  | 25%                          | 20         | 0                    | 0%                           |
| Patient 12 | 4          | 0                    | 0%                           | 7.5        | 3.5                  | 47%                          | 9          | 0                    | 0%                           |
| Patient 13 | 7          | 2                    | 29%                          | N/A        | N/A                  | N/A                          | 33         | 0                    | 0                            |

**Table S4.** Statistics of total CTC number and PD-L1 (+) CTC % at different visits for 12 patients (Patient 1-12). (SD: standard deviation)

|         | CTC range (/ml) | Median of CTC number (/ml) | Average of CTC number (/ml) | SD of CTC number | PD-L1 (+) CTC % range | Median of PD-L1 (+) CTC % | Average of PD-L1 (+) CTC % | SD for PD-L1 (+) CTC % |
|---------|-----------------|----------------------------|-----------------------------|------------------|-----------------------|---------------------------|----------------------------|------------------------|
| Visit 1 | 5 - 72          | 15.5                       | 27.9                        | 26.0             | 0 - 22.2%             | 0.7%                      | 7.1%                       | 8.7%                   |
| Visit 2 | 4 - 70          | 14.3                       | 21.9                        | 20.3             | 0 - 61.4%             | 24.7%                     | 28.3%                      | 19.6%                  |
| Visit 3 | 4 - 24          | 12.5                       | 14.4                        | 8.2              | 0 - 53.1%             | 8.0%                      | 15.9%                      | 19.2%                  |

**Table S5.** Progression-free survival (PFS) of patients. ("NED" stands for "no evidence of disease", censor = 0 for event and censor = 1 for censored records.)

| Patient    | Status            | PFS (months) | PFS censor |
|------------|-------------------|--------------|------------|
| Patient 1  | Alive, Progressed | 6.7          | 0          |
| Patient 2  | Alive, NED        | 2.3          | 1          |
| Patient 3  | Alive, NED        | 9.9          | 1          |
| Patient 4  | Alive, NED        | 9.6          | 1          |
| Patient 5  | Alive, NED        | 14.6         | 1          |
| Patient 6  | Alive, NED        | 18.9         | 1          |
| Patient 7  | Dead              | 6.5          | 0          |
| Patient 8  | Dead              | 5.7          | 0          |
| Patient 9  | Alive, NED        | 14.9         | 1          |
| Patient 10 | Alive, NED        | 17.5         | 1          |
| Patient 11 | Dead              | 7.4          | 0          |
| Patient 12 | Alive, Progressed | 7.5          | 0          |
| Patient 13 | Alive, Progressed | 8.3          | 0          |

**Table S6.** PD-L1 pixel intensities of negative control samples and selected PD-L1 (+) CTCs in patient samples.

| Samples                        | PD-L1 pixel intensity difference | 95% of PD-L1 pixel intensity difference |
|--------------------------------|----------------------------------|-----------------------------------------|
| Healthy Control                | 0 - 24                           | 21                                      |
| PD-L1 negative cell line H1650 | 0 - 17                           | 8.2                                     |
| CTC 1                          | 70                               | N/A                                     |
| CTC 2                          | 39                               | N/A                                     |
| CTC 3                          | 105                              | N/A                                     |
| CTC 4                          | 205                              | N/A                                     |
